# Supplementary material for: Stimulation of the Migration and Expansion of Adult Mouse Neural Stem Cells by the FPR2-Specific Peptide WKYMVm
Source: MDPI journal article supplement (doi:10.3390/life11111248), 2021-11-17
Supplement: s1 [file s1]

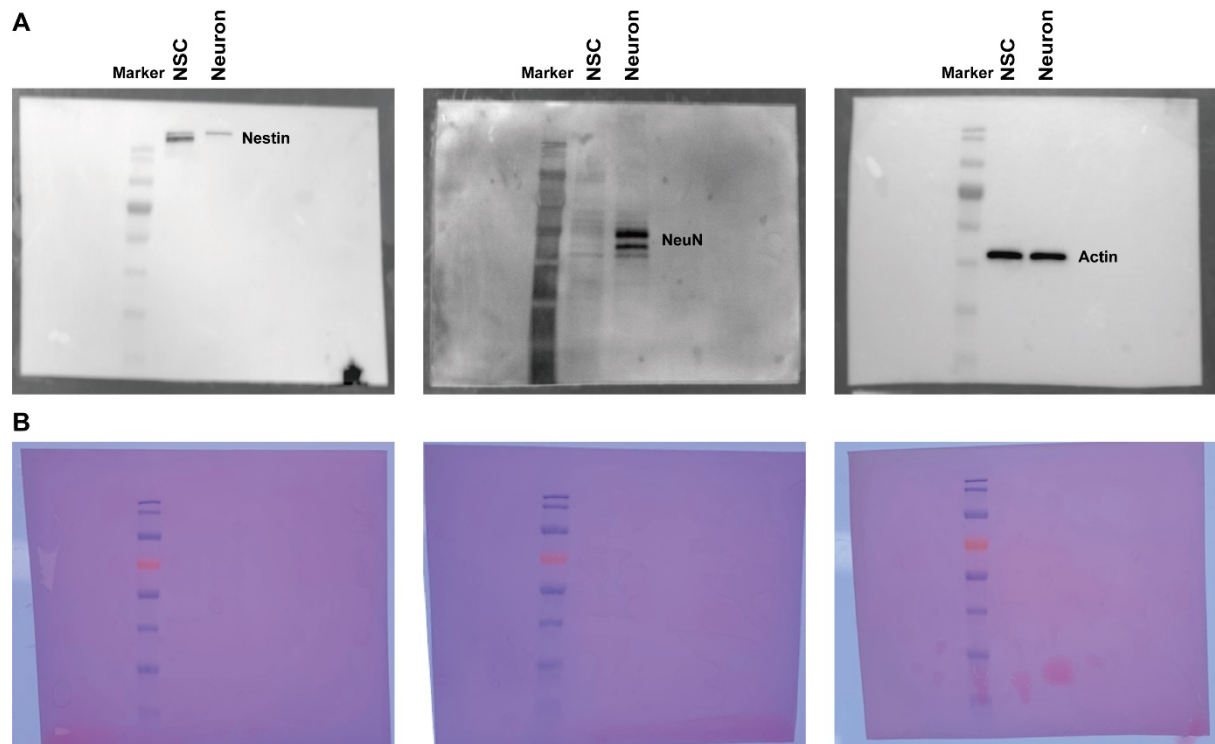

**Supplementary Figure S1. Original western blot images from figure 2C. (A)** Uncropped western blot images containing molecular weight markers of mNSCs and primary neurons using Nestin, NeuN and Actin are shown. **(B)** Ponceau S staining of membranes after protein transfer.
